# Supplementary material for: Room-Temperature Self-Healable Blends of Waterborne Polyurethanes with 2-Hydroxyethyl Methacrylate-Based Polymers
Source: MDPI journal article supplement (doi:10.3390/ijms24032575), 2023-01-29
Supplement: s1 [file s1]

# Supporting Information

## Room-temperature self-healable blends of waterborne polyurethanes with 2-hydroxyethyl methacrylate-based polymers

Ioanna Tzoumani <sup>1</sup>, Zacharoula Iatridi <sup>1</sup>, Athena M. Fidelli <sup>2</sup>, Poppy Krassa <sup>2</sup>, Joannis K. Kallitsis <sup>1</sup>, Georgios Bokias <sup>1,\*</sup>

1. Department of Chemistry, University of Patras, GR-26504, Patras, Greece;
2. Megara Resins Anastassios Fanis S.A., Vathi Avlidas, GR-34100 Evia, Greece

\* Correspondence: [bokias@upatras.gr](mailto:bokias@upatras.gr)

The morphology of the obtained films was investigated by scanning electron microscopy (SEM) using a Zeiss ZUPRA 35 VP-FEG instrument (Carl Zeiss, Germany), operating at 5–20 keV. The films were coated with a conductive Au film through sputtering.

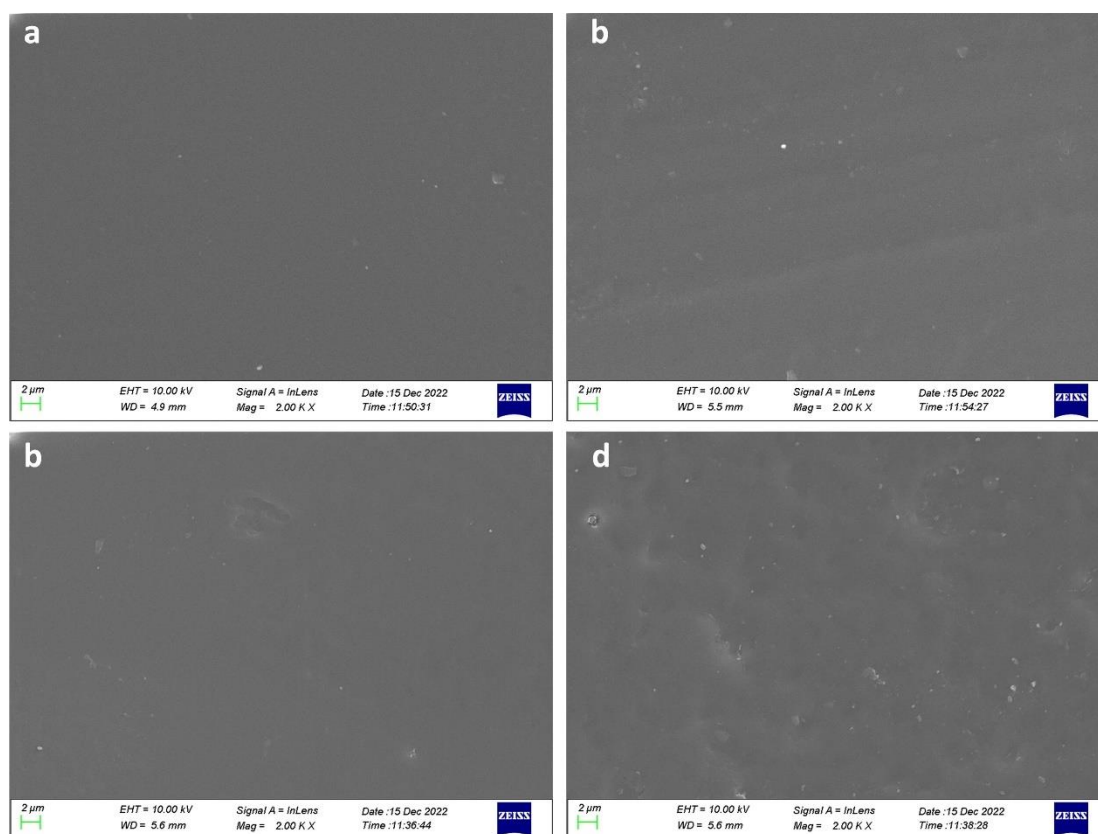

**Figure S1.** SEM images of a) pure WPU1, b) pure WPU2, c) composite WPU1/20P(HEMA-co-DMAM50) and d) composite WPU2/20P(HEMA-co-DMAM50) polyurethane film surfaces.

Dynamic mechanical analysis (DMA) was performed with a solid-state analyzer RSA II, Rheometric Scientific L.t.d. (West Yorkshire, UK) at 10Hz, in the temperature range of  $-20^{\circ}\text{C}$  up to  $200^{\circ}\text{C}$  with a heating rate of  $3^{\circ}\text{C}/\text{min}$ .

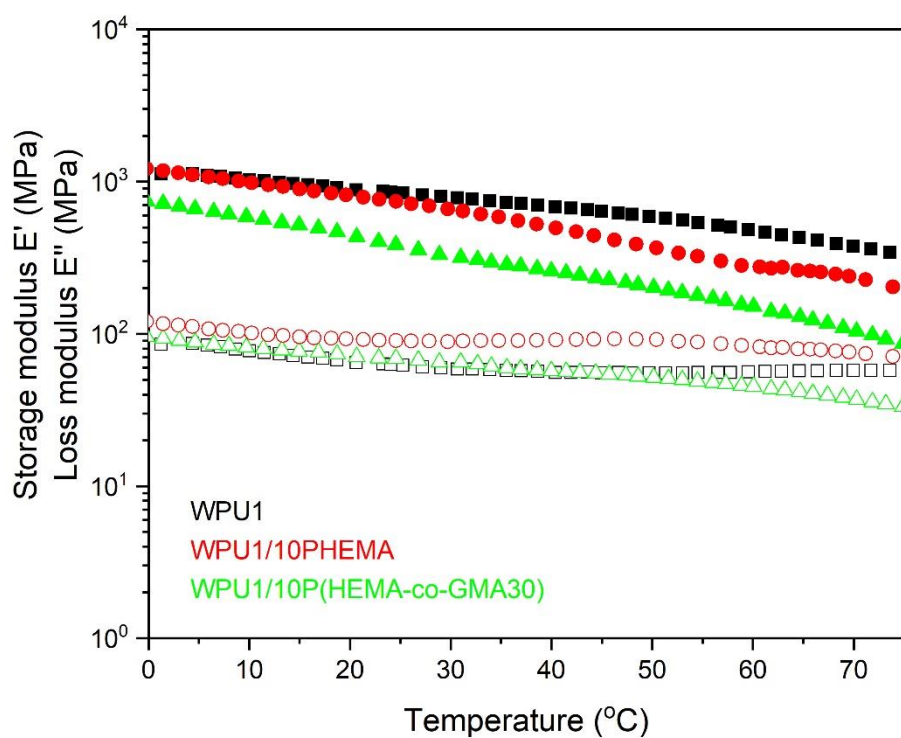

**Figure S2.** Storage modulus ( $E'$ , closed symbols) and loss modulus ( $E''$ , open symbols) for pure WPU1 film (black,  $\blacksquare$ ), WPU1/10PHEMA composite film (red,  $\bullet$ ) and WPU1/10PHEMA composite film (green,  $\blacktriangle$ ).
